# Supplementary figures and images for: Yttrium‐90 Radioembolization for the Treatment of Solitary, Unresectable HCC: The LEGACY Study
Source: PubMed Central journal article supplement — Hepatology. 2021 Jun 11;74(5):2342–52. doi: 10.1002/hep.31819 (PMC8596669; doi:10.1002/hep.31819), 2021-06-11

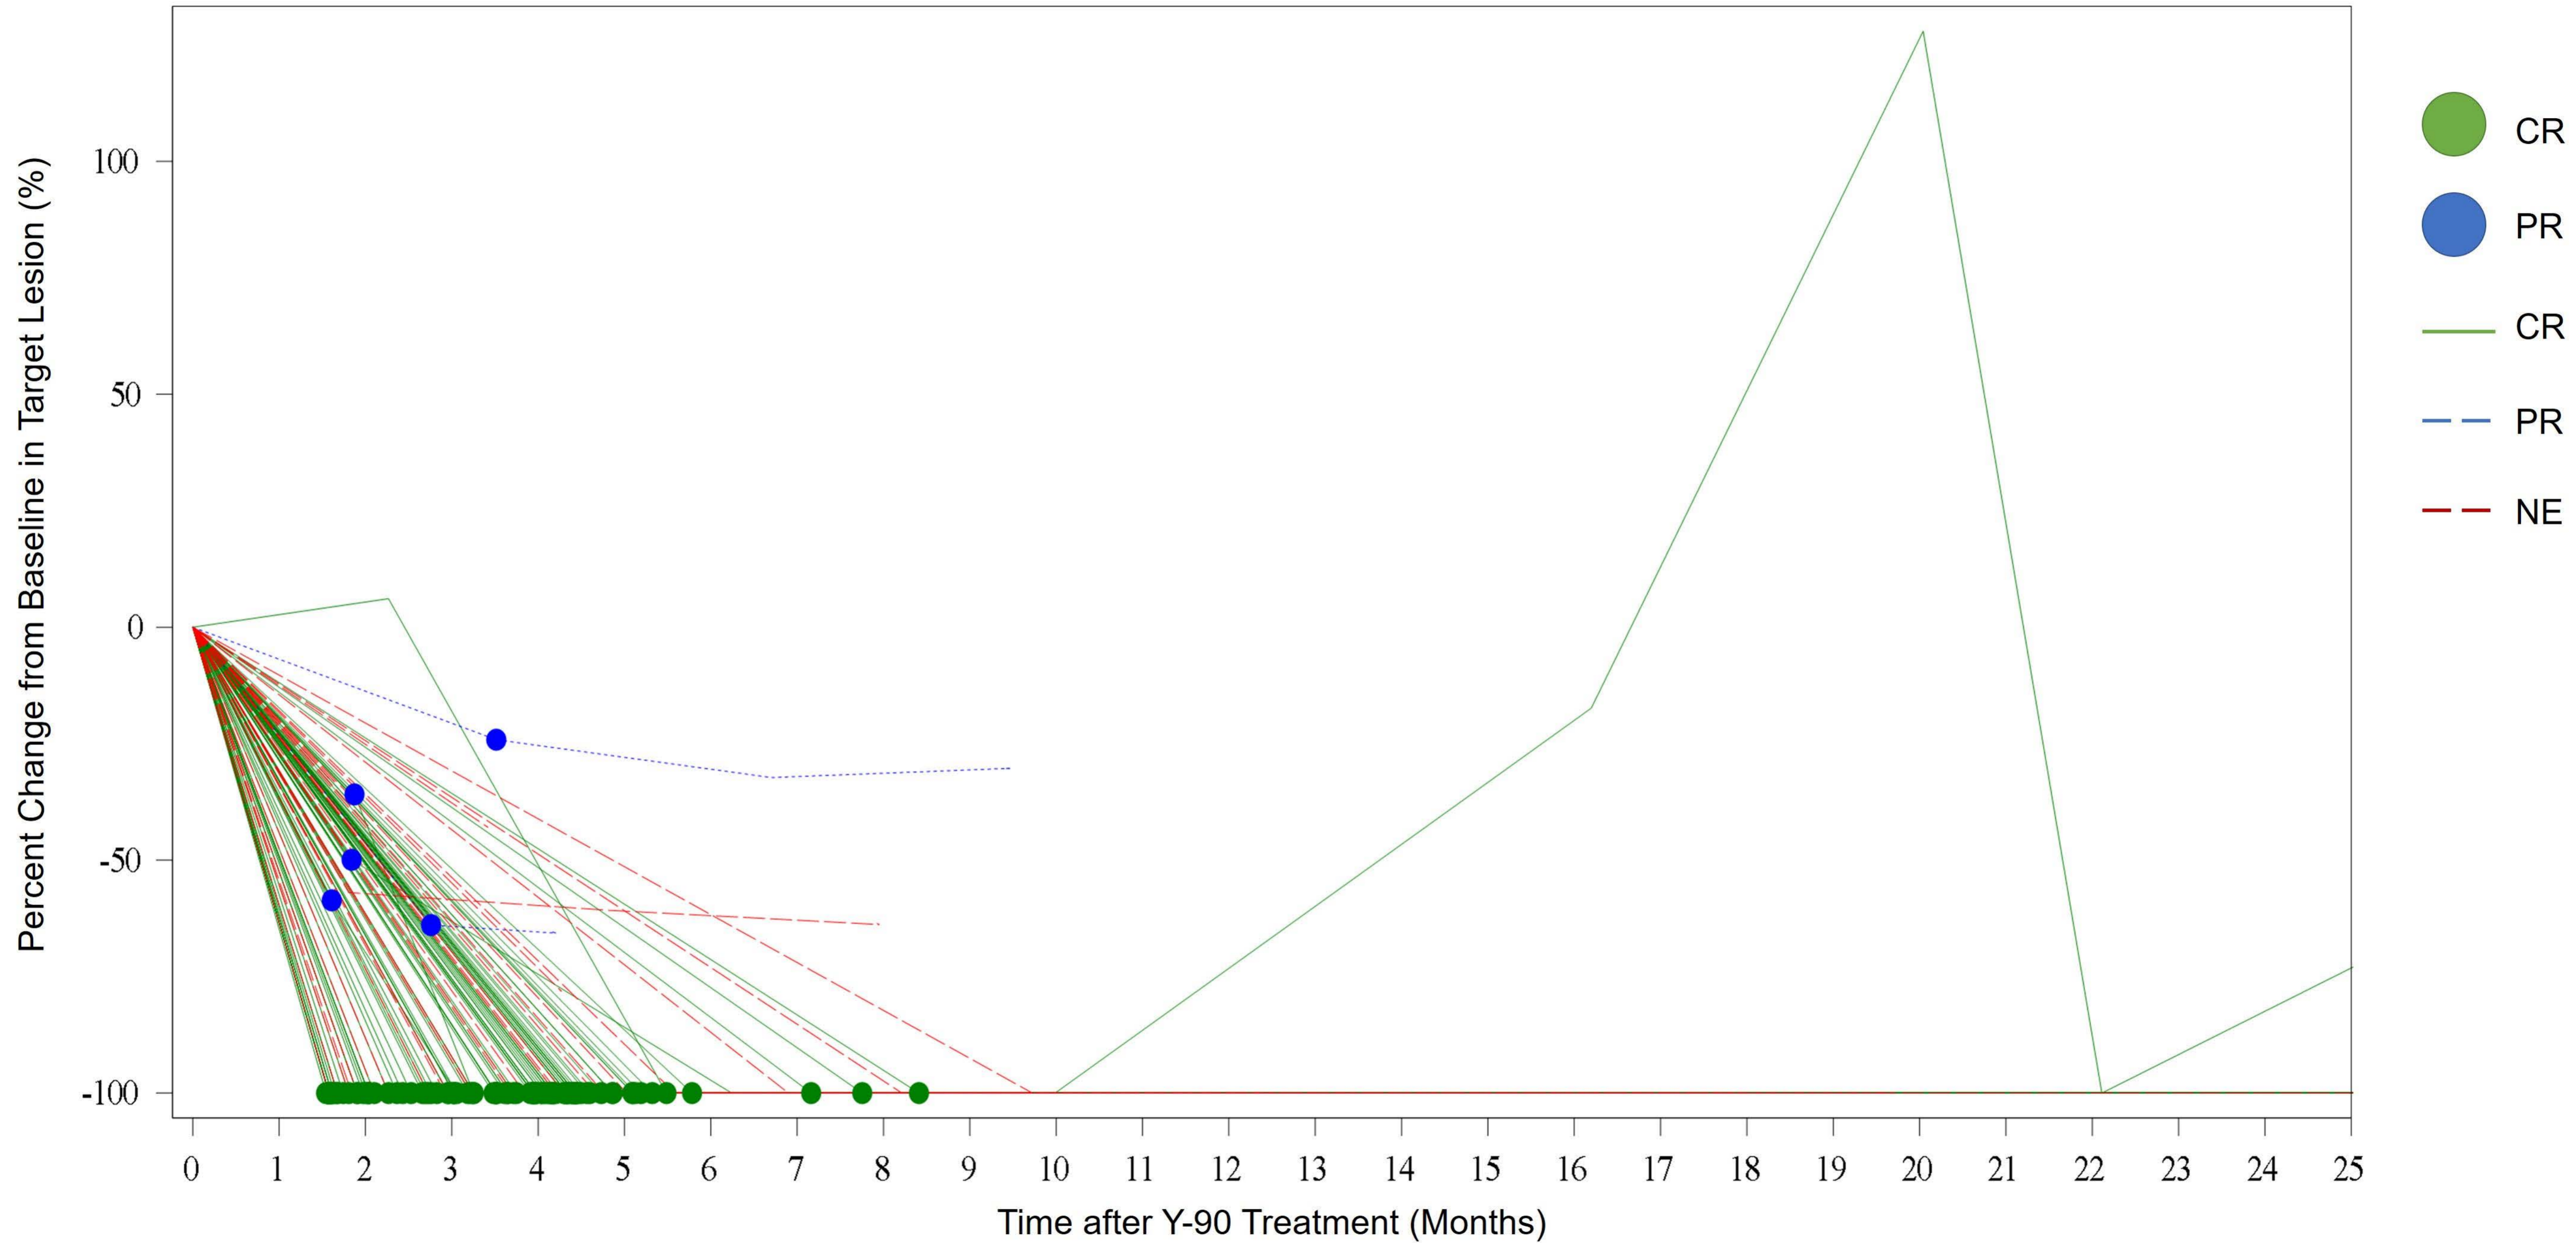

Supplement: HEP-74-2342-s001.pdf [file HEP-74-2342-s001.pdf]
